# Supplementary material for: Is the Experience of Thermal Pain Genetics Dependent?
Source: Biomed Res Int. 2015 Jan 28;2015:349584. doi: 10.1155/2015/349584 (PMC4324494; doi:10.1155/2015/349584)
Supplement: Supplementary file 1 — Supplementary Table: Summary of single nucleotide polymorphism (SNP) previously related with thermal pain perception and analyzed in this review. [file 349584.f1.pdf]

| gene         | full name                        | chromosome | polymorphism<br>(dbSNP database<br>number) | minor/major allele | position             | relation with pain                                                                                                                        | reference                 | metod                                             |
|--------------|----------------------------------|------------|--------------------------------------------|--------------------|----------------------|-------------------------------------------------------------------------------------------------------------------------------------------|---------------------------|---------------------------------------------------|
| <i>TRPA1</i> | Ankyrin like protein             | 11         | rs1198795                                  | G/A                | intronic             | A/A genotype reported less cold pain tolerance compared to G/G (mixed ethnicities)                                                        | Kim et al., 2006          | ice cold water                                    |
| <i>TRPV1</i> | Vanilloid Receptor<br>lonophore  | 17         | rs8065080                                  | C/T(ileucine)      | exonic<br>(missense) | females European Americans T/T showed longer pain-response time to cold stimuli.                                                          | Kim et al., 2004          | ice cold water                                    |
|              |                                  |            |                                            |                    |                      | not significant association with cold pain sensitivity in Europeans Americans                                                             | Kim et al., 2006 and 2012 | ice cold water                                    |
| <i>OPRD1</i> | Opioid Receptor $\delta 1$       | 1          | rs2234918                                  | C/T                | exonic (synon)       | increased heat pain intensity                                                                                                             | Kim et al., 2006          | thermode 35 to 49°C at 5s                         |
|              |                                  |            |                                            |                    |                      | not association with variation in thermal pain thresholds                                                                                 | Sato et al., 2013         | thermode at 1s                                    |
|              |                                  |            |                                            |                    |                      | no difference in pain perception between genotypes in Caucasian sample                                                                    | Doehring et al., 2011     | thermode at 3s                                    |
|              |                                  |            | rs1042114                                  | G/T(Phe)           | exonic<br>(missense) | marginal significant decrease in heat pain intensity in heterozygous.                                                                     | Kim et al., 2004          | thermode 35 to 49°C at 5s                         |
|              |                                  |            |                                            |                    |                      | not association with variation in thermal pain thresholds in Caucasian sample                                                             | Sato et al., 2013         | thermode at 1s                                    |
|              |                                  |            |                                            |                    |                      | not association with pain thresholds: von frey, heat, cold, blunt pressure either electric in Caucasian sample                            | Doehring et al., 2011     | thermode at 3s                                    |
| <i>COMT</i>  | catechol-O-<br>methyltransferase | 22         | rs4680 (Val158Met)                         | G/A (Met)          | exonic<br>(missense) | no association with cold pressor pain                                                                                                     | Birklein et al., 2008     | cold pressor test                                 |
|              |                                  |            |                                            |                    |                      | greater heat pain temporal summation VAS reported in AA genotype                                                                          | Diatchenko et al., 2005   | computer controlled thermode masseter muscle skin |
|              |                                  |            |                                            |                    |                      | no association with heat/cold pain sensation in Europeans Americans                                                                       | Kim et al., 2006          | thermode 35 to 49°C at 5s                         |
|              |                                  |            |                                            |                    |                      | no difference in capsaicin heat pain effect sizes between genotype in Caucasian sample                                                    | Doehring et al., 2011     | thermode at 0.3°/s                                |
|              |                                  |            |                                            |                    |                      | no genotype influence on heat pain perception neither in healthy subjects nor in borderline personality disorder. Ethnicity not specified | Schmahl et al., 2012      | peltier based thermode                            |

|              |                         |    |                                          |           |                   |                                                                                                                                                                                                                                      |                         |                                                                                            |
|--------------|-------------------------|----|------------------------------------------|-----------|-------------------|--------------------------------------------------------------------------------------------------------------------------------------------------------------------------------------------------------------------------------------|-------------------------|--------------------------------------------------------------------------------------------|
|              |                         |    | rs4633                                   | C/T       | exonic (synon)    | no difference in pain effect sizes between genotype in Caucasian sample                                                                                                                                                              | Doehring et al., 2011   | thermode at 0.3°/s                                                                         |
|              |                         |    |                                          |           |                   | decreased thermal and pressure pain                                                                                                                                                                                                  | Diatchenko et al., 2005 | computer controlled thermode masseter muscle skin                                          |
|              |                         |    |                                          |           |                   | heterozygous presented higher pain threshold                                                                                                                                                                                         | Xiang et al, 2012       |                                                                                            |
|              |                         |    | rs6269                                   | G/A       | intronic          | accounted for 6% of the variation in pain sensitivity                                                                                                                                                                                | Diatchenko et al., 2005 |                                                                                            |
|              |                         |    | rs4818                                   | G/C/T     | exonic (synon)    | accounted for 7% of the variation in pain sensitivity                                                                                                                                                                                | Diatchenko et al., 2005 |                                                                                            |
| DRD3         | dopamin receptor d3     | 3  | rs4646312                                | C/T       | promoter          | decreased cold pain intensity                                                                                                                                                                                                        | Kim et al., 2006        |                                                                                            |
|              |                         |    | rs165599                                 | G/A       | 3/A65             | associated with thermal pain ratings to the initial first pulse from the train of 10 pulses delivered at 47 °C in Caucasians females                                                                                                 | Belfer et al., 2013     |                                                                                            |
|              |                         |    | rs6280(Ser9Gly)                          | C/T (Ser) | exonic (missense) | Gly-Gly presented higher thermal pain thresholds in both healthy participant and fibromyalgia patients. Gly-Gly (linked to highest receptor activity) was associated with higher TPTs, that is less analgesia                        | Potvin et al, 2009      | thermode with temperature increasing from 32 to 51 by a rate of 0.3 degrees per second     |
|              |                         |    |                                          |           |                   |                                                                                                                                                                                                                                      |                         |                                                                                            |
|              |                         |    |                                          |           |                   |                                                                                                                                                                                                                                      |                         |                                                                                            |
| SLC6A3 (DAT) | Dopamine Transporter    | 5  | 40bp repeat in the 3'untranslated region |           | 30bp              | No association of condition thermal pain inhibition                                                                                                                                                                                  | Treister et al., 2011   | cold pressor test conditioned modulation.                                                  |
| MC1R         | Melanocortin Receptor 1 | 16 | rs1805007 (Arg151Cys)                    | T/C (Cys) | exonic (missense) | association between this polymorphism and tolerance to cold pain                                                                                                                                                                     | Treister et al., 2009   | cold pressor thest with water bath at 1°C                                                  |
|              |                         |    |                                          |           |                   | redheaded woman (Arg) are more sensitive to thermal pain stimuli.                                                                                                                                                                    | Liem et al, 2005        | exposed to a thermodein the forearm with temperature increasing rate of 0.5°C/second [37]. |
| SLC6A4       | serotonin transporter   | 17 | 5-HTTLPR                                 | Sa/Lg/La  | promoter          | high expression group presented lower heat pain threshold and higher cold-pain threshold when compared to low expression. (low expression group showed reduced sensitivity to heat and cold pain ) in self-reported European decent. | Lindstedt et al., 2011  | thermode                                                                                   |

|         |                         |    |           |          |                   |                                                                                                                                                                                                                                                                                                                                                                             |                        |                                                                      |
|---------|-------------------------|----|-----------|----------|-------------------|-----------------------------------------------------------------------------------------------------------------------------------------------------------------------------------------------------------------------------------------------------------------------------------------------------------------------------------------------------------------------------|------------------------|----------------------------------------------------------------------|
|         |                         |    |           |          |                   | relative to the s-allele homozygous, the carriers of the l-allele have an additively higher thermal pain inhibition. OBS: only bi-allelic was genotypes and also, mixed ethnicities.                                                                                                                                                                                        | Treister et al., 2011  | thermode to the hand 37-47 at 10degrees per second                   |
|         |                         |    | rs3813034 | A/C      | 3/C81             | no differences in pain thresholds (cold and pressure pain) between genotype in Japanese population.                                                                                                                                                                                                                                                                         | Aoki et al., 2010      | cold pressor test                                                    |
| 5-HTR1A | serotonin receptor 1A   | 5  | rs6295    | C/G      | promoter          | G-carriers of European decent exhibited the expected thermal hypoalgesia at threshold-level intensities, as compared to C-homozygote (perhaps hypoalgesia was abolished at higher intensities). G-carriers exhibited reduced sensitivity to cold pain (lower thresholds) and a tendency for higher heat-pain thresholds, but not significant, perhaps underpowered problem. | Lindstedt et al., 2012 | A computer controlled Peltier-type thermode                          |
| OPRM1   | Opioid Receptor $\mu$ 1 | 6  | rs1799971 | G/A(Asn) | exonic (missense) | significant interaction between sex and genotype in heat pain ratings at 49C. The rare allele was associated with lower pain ratings among men but higher pain ratings among women.                                                                                                                                                                                         | filligim et al., 2005  | thermode in 3 different parts of the body 0.5C/second                |
|         |                         |    |           |          |                   | No association with either thermal pain or muscle pain in Caucasians volunteers                                                                                                                                                                                                                                                                                             | Sato et al., 2013      | computer driven heat pain device (thermode) in forearm 32-52 at 1C/s |
| OPRK    | opioid receptor K       | 21 | rs643799  | T/C      | intronic          | C-carriers presented lower thermal pain thresholds                                                                                                                                                                                                                                                                                                                          | Sato et al., 2013      | computer driven heat pain device (thermode) in forearm 32-52 at 1C/s |
